# Supplementary material for: Oligo (Poly (Ethylene Glycol) Fumarate)-Based Multicomponent Cryogels for Neural Tissue Replacement
Source: MDPI journal article supplement (doi:10.3390/gels9020105), 2023-01-25
Supplement: s1 [file s1]

Supplementary Materials

A

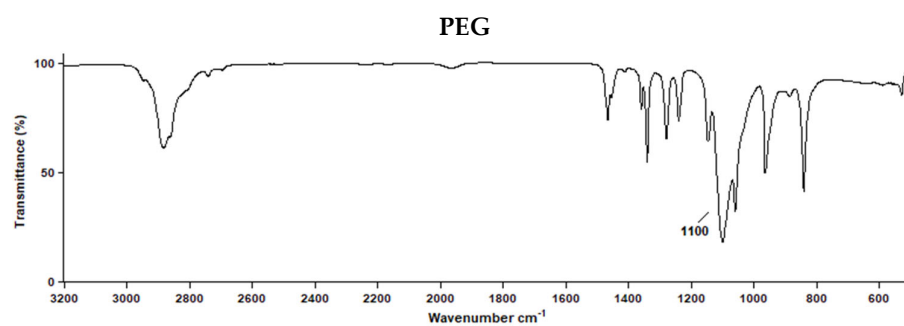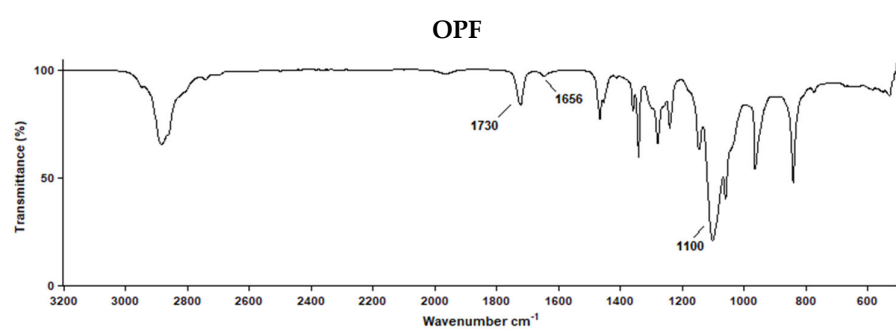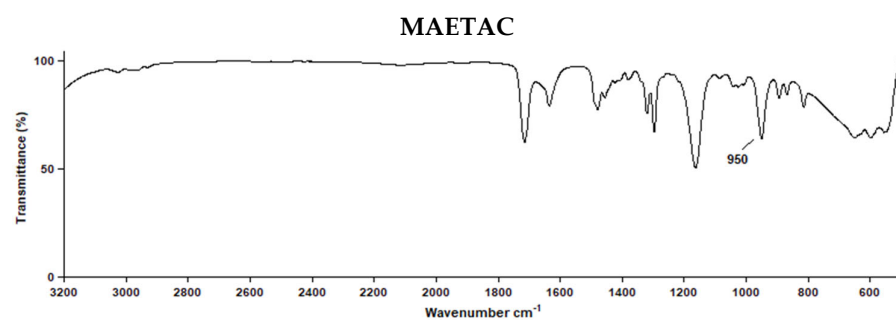

B

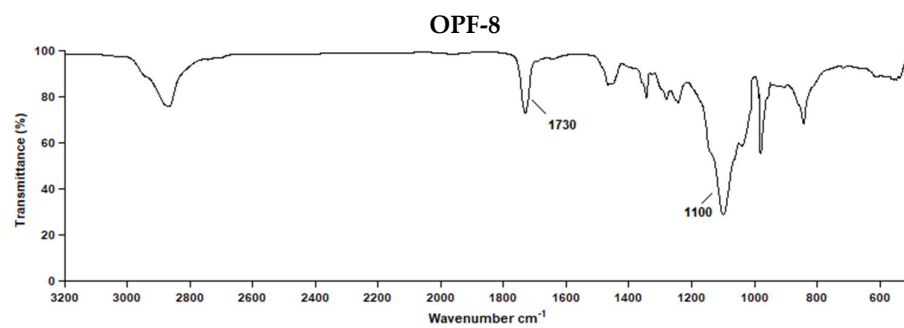

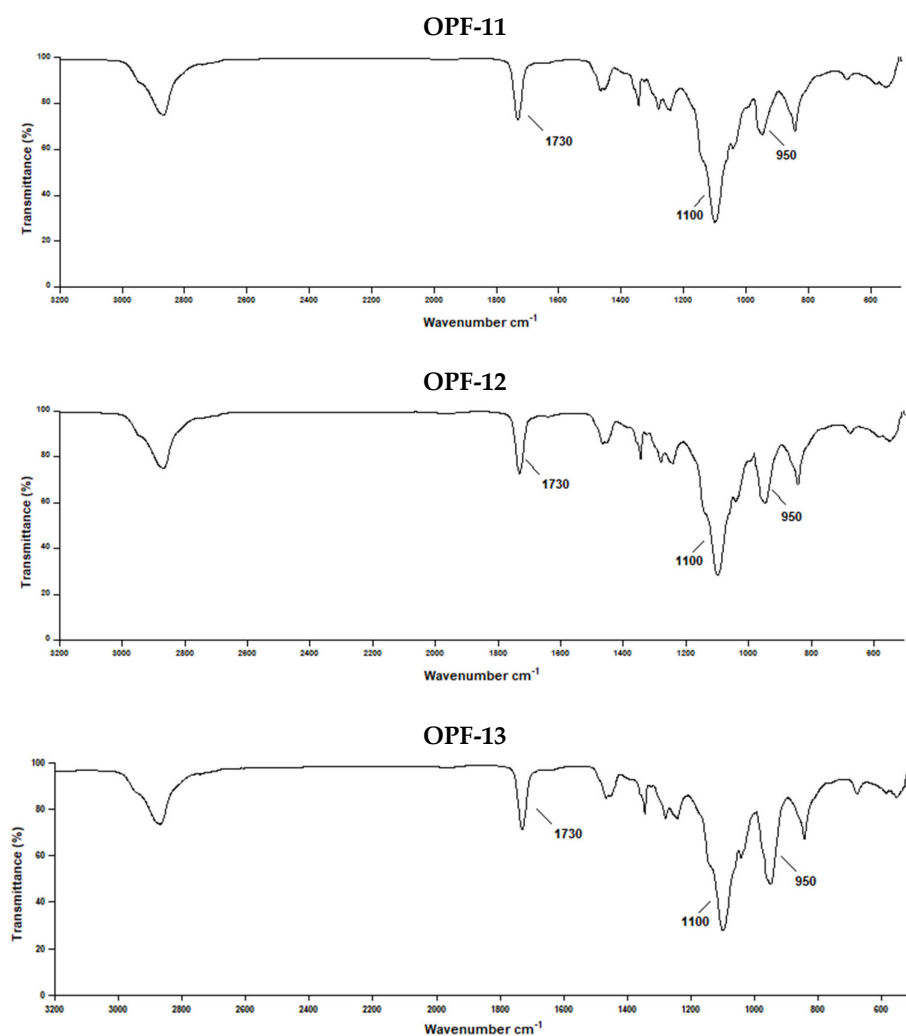

C

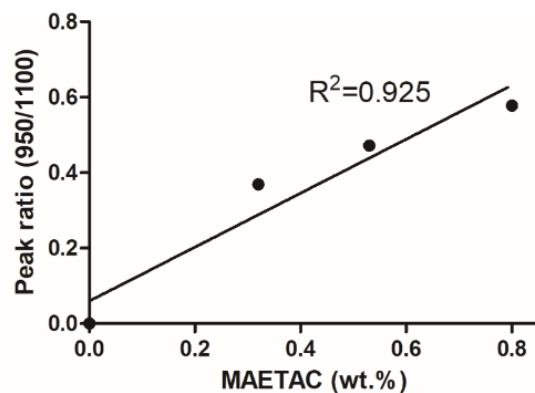

**Figure S1.** FTIR spectra of PEG, OPF, MAETAC (A) and lyophilized OPF/PEGDA cryogels with increased MAETAC amount (B). Relationship between MAETAC concentration in reaction solution and FTIR signal of MAETAC in cryogels determined by the peak intensity ratio 950/1100  $\text{cm}^{-1}$  (C).

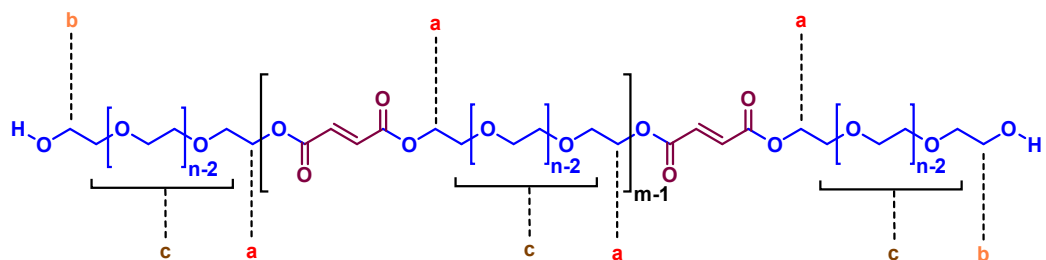

A

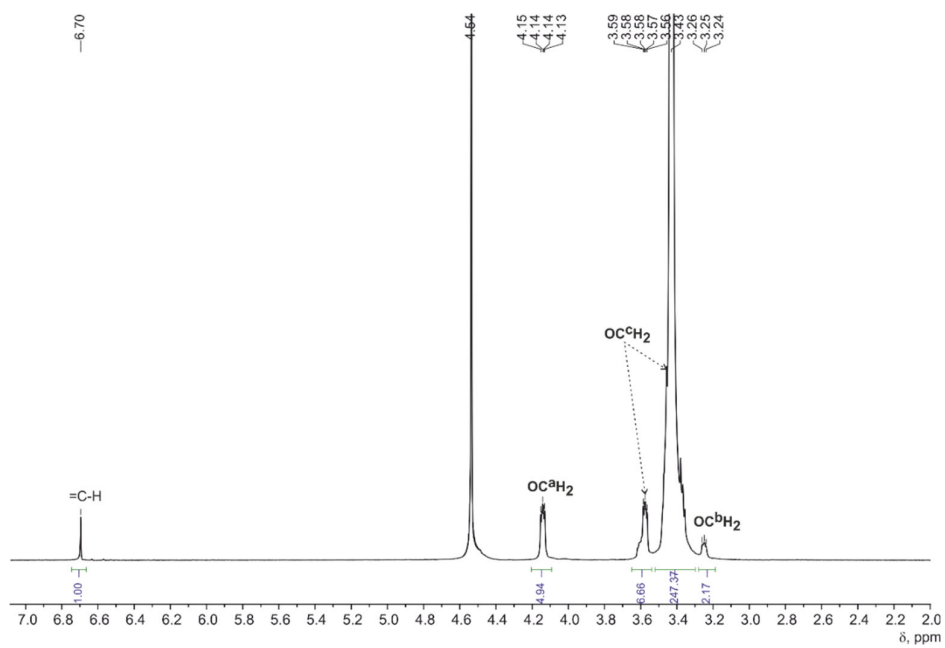

B

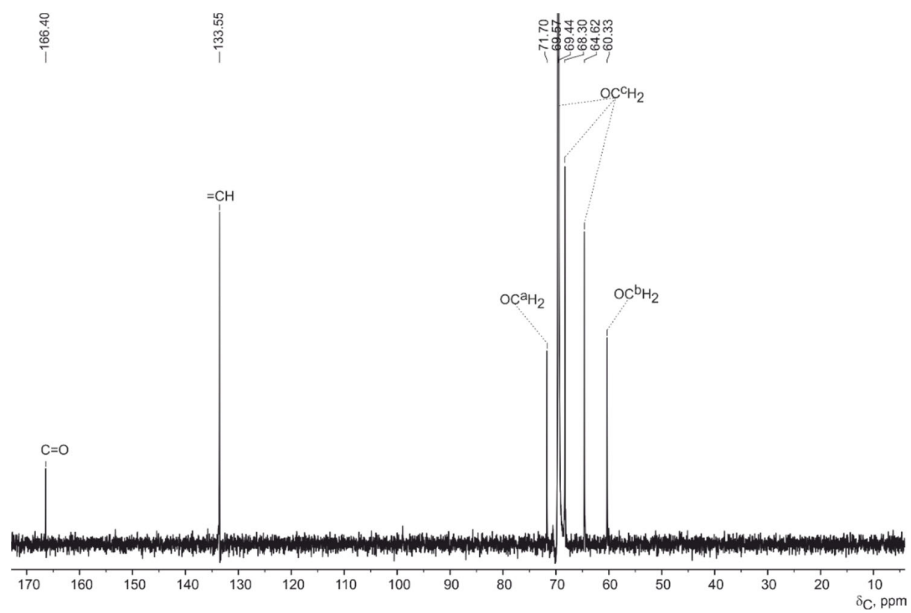

**Figure S2.**  $^1\text{H}$  NMR spectrum (400 MHz,  $\text{D}_2\text{O}$ , ambient temperature) (A) and  $^{13}\text{C}$ - $\{^1\text{H}\}$  NMR spectrum (100.6 MHz,  $\text{D}_2\text{O}$ , ambient temperature) (B) of oligo (poly(ethylene glycol) fumarate) (OPF) macromer.

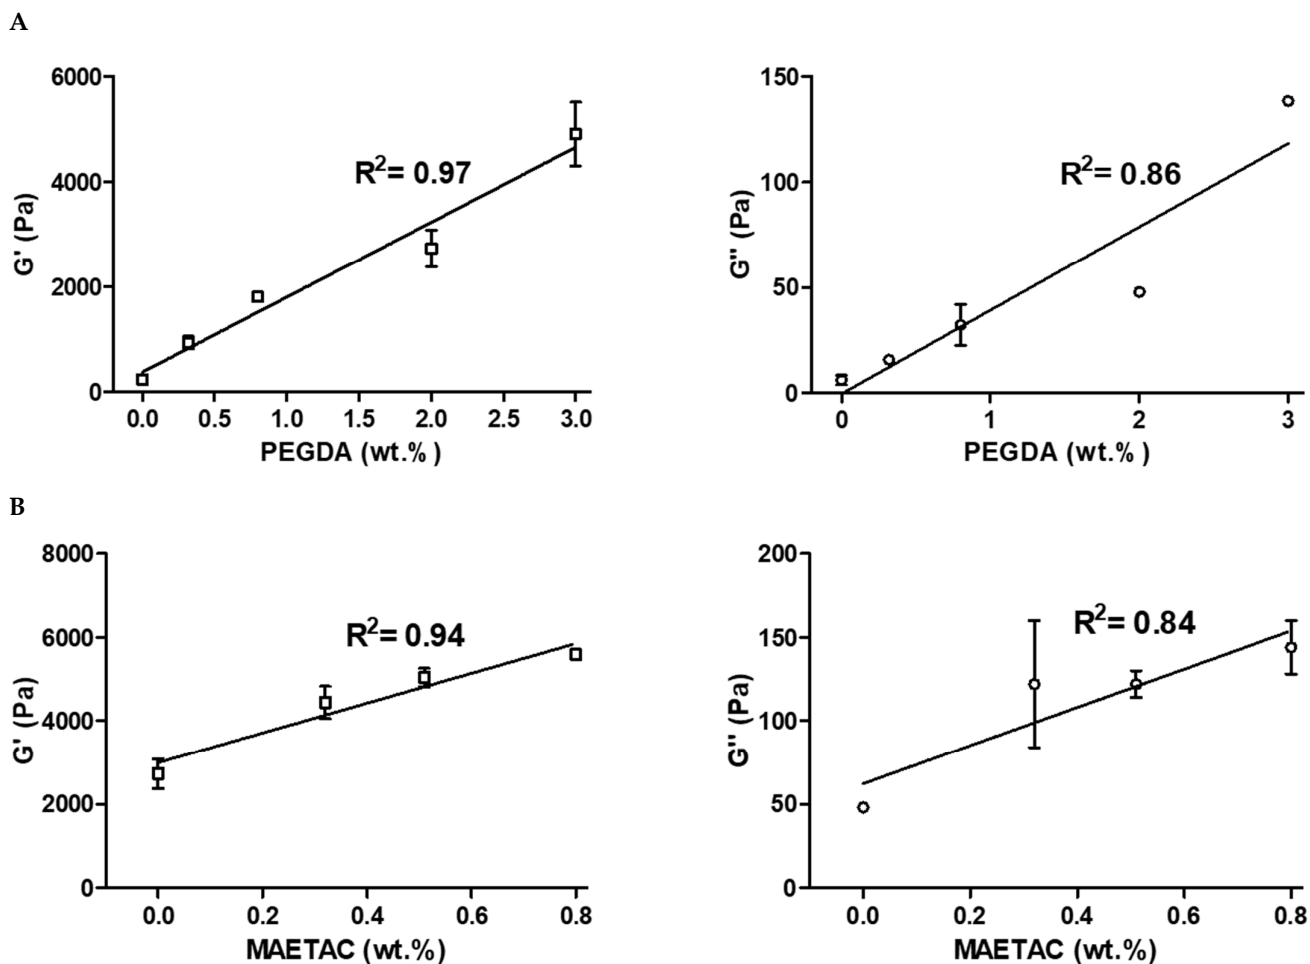

**Figure S3.** Relationships between  $G'/G''$  moduli of OPF cryogels (OPF 4 wt.%) and amount of PEGDA (A) and OPF/PEGDA cryogels (OPF 4 wt.%, PEGDA 2 wt.%) and amount of MAETAC (B).

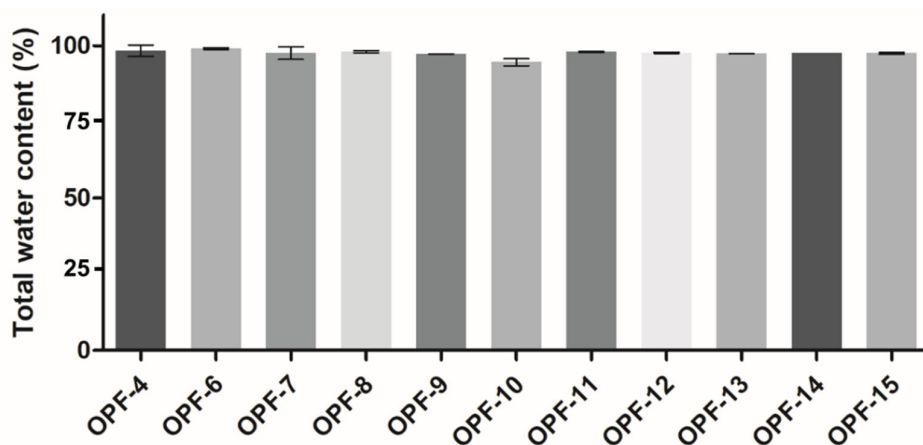

**Figure S4.** Overall swelling index (total water content %) for OPF-based cryogels.

**Group D** (OPF 4 %, *PEGDA* *y*%, MAETAC 0.8%)

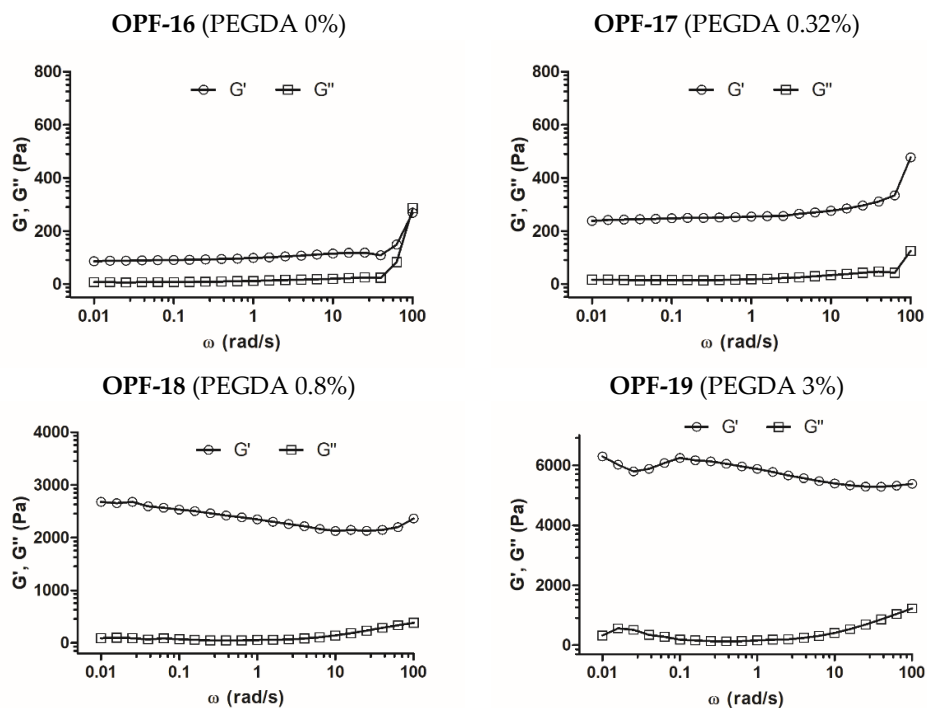

**Figure S5.** Frequency sweep analysis of OPF-based cryogels (group D). The measurement of frequency dependence of storage ( $G'$ ) and loss ( $G''$ ) modulus was performed within LVR at  $\delta = 0.5\%$  strain deformation. Cryogel compositions (wt. %) are shown in parentheses.
